# Supplementary material for: Oxygen vacancy-enriched NiO nanozymes achieved via facile annealing in argon for detection of l-Cys
Source: Royal Society of Chemistry journal article supplement (doi:10.1039/d5an00054h), 2025-01-01
Supplement: d5an00054h1.pdf [file d5an00054h1.pdf]

## Supporting information

### **Oxygen Vacancy-Enriched NiO Nanozymes Achieved by Facile Annealing in Argon for Detection of L-Cys**

Sihua Wu,<sup>a</sup> Jinhui Zou,<sup>a</sup> Baohua Zhang,<sup>\*a,b</sup> Jiantian Lu,<sup>a</sup> Guanrong Lin,<sup>a</sup> Yuwei Zhang <sup>\*a,c</sup> and Li Niu<sup>a,d</sup>

<sup>a</sup> Guangzhou Key Laboratory of Sensing Materials & Devices, Center for Advanced Analytical Science, School of Chemistry and Chemical Engineering, Guangzhou University, Guangzhou 510006, China. E-mail: ccbhzhang@gzhu.edu.cn

<sup>b</sup> State Key Laboratory of Organic Electronics and Information Displays & Institute of Advanced Materials (IAM), Nanjing University of Posts & Telecommunications, Nanjing, 210023, China

<sup>c</sup> GDMPA Key Laboratory for Process Control and Quality Evaluation of Chiral Pharmaceuticals, Guangzhou Key Laboratory of Analytical Chemistry for Biomedicine, School of Chemistry, South China Normal University, Guangzhou 510006, China. E-mail: ywzhang@scnu.edu.cn

<sup>d</sup> Sun Yat Sen University, School of Chemical Engineering and Technology, Zhuhai 519000, China.

Corresponding Author

\*(B.Z.) E-mail: ccbhzhang@gzhu.edu.cn

\*(Y.Z.) E-mail: ywzhang@scnu.edu.cn

## 1. Supplementary Figures

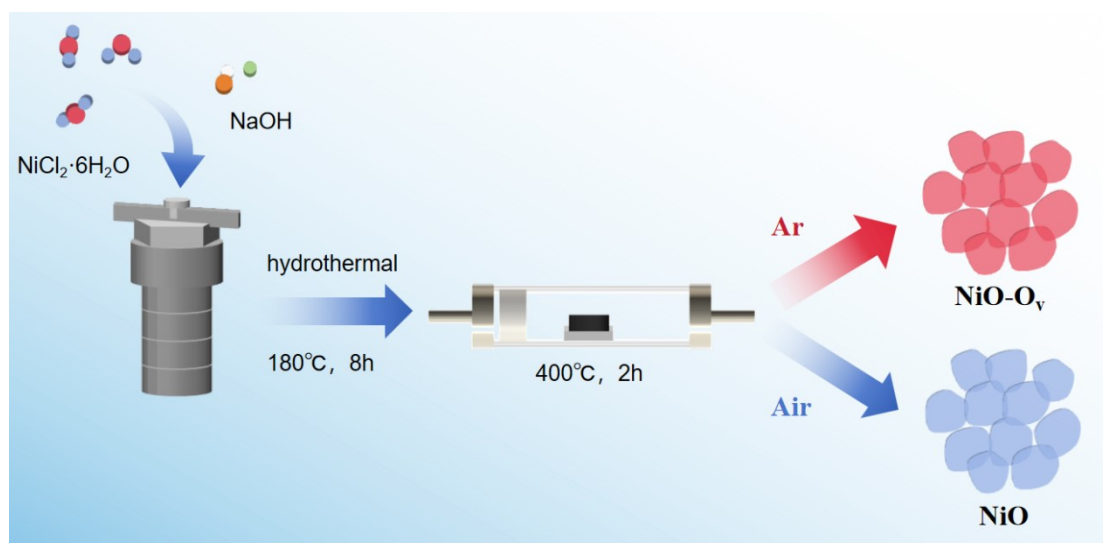

**Figure S1.** The synthetic route of NiO and NiO-O<sub>v</sub> samples.

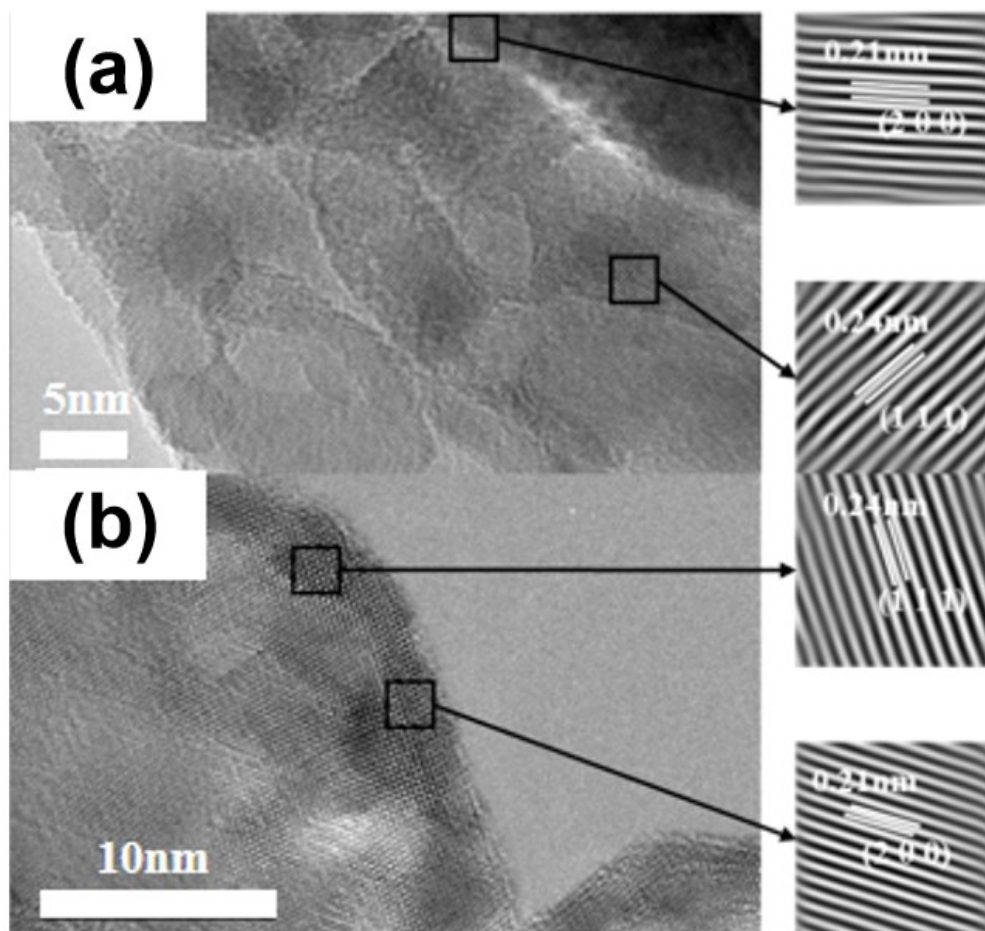

**Figure S2.** High-resolution TEM of (a) NiO; (b) NiO-Ov (The black boxes correspond to the Fourier-transformed lattice stripes)

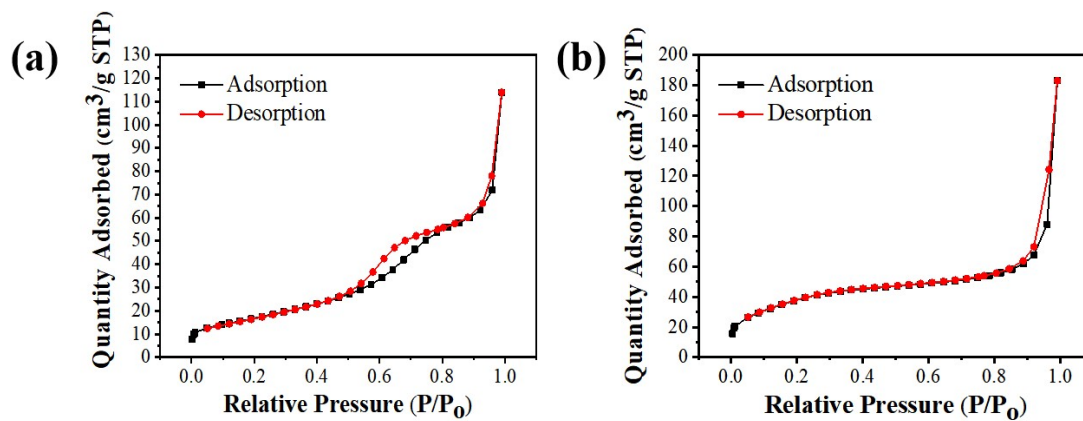

**Figure S3.** BET test curve comparison: (a) NiO; (b) NiO-O<sub>v</sub>.

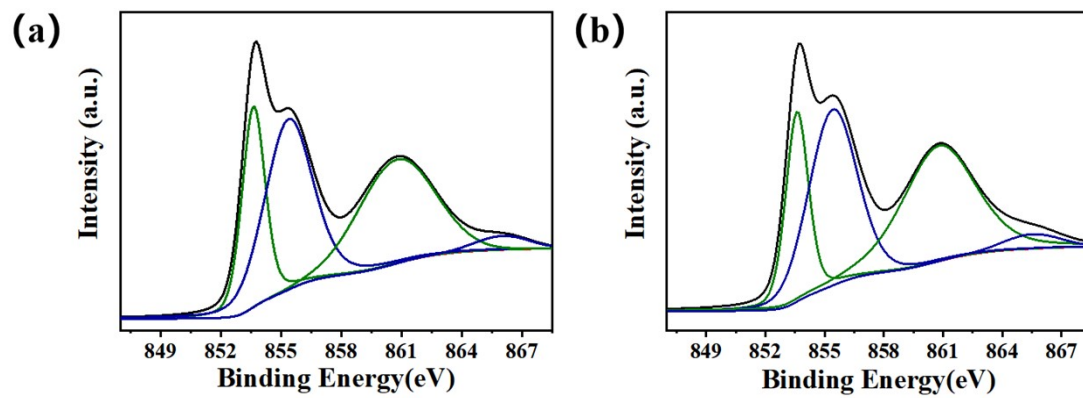

**Figure S4.** XPS spectra of different samples of Ni<sub>2p</sub>: (a) NiO; (b) NiO-O<sub>v</sub>.

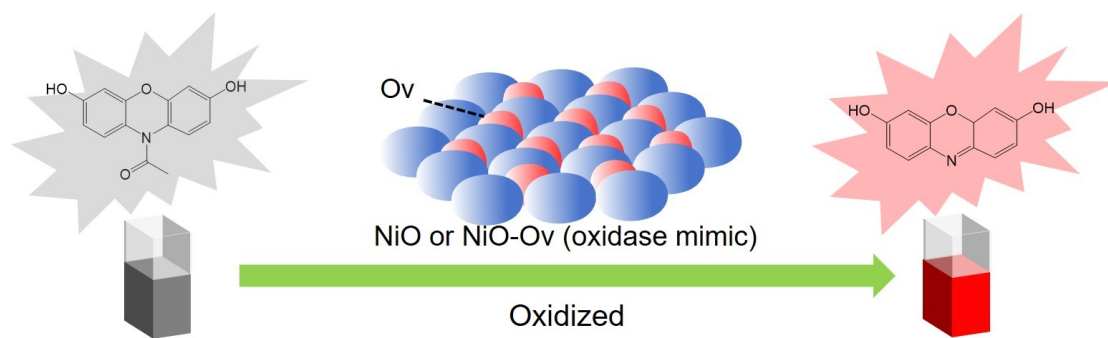

**Figure S5.** Schematic diagram of Fluorescent turn-on process for catalysis of NiO or NiO-Ov nanozyme on AR to resorufin.

## 2. Supplementary Tables

**Table S1.** Structural parameters of NiO samples calcined in different atmospheres

| <b>Sample</b>      | <b>2<math>\theta</math> (°)</b> | <b>FWHM</b> | <b>Grain size<sup>a</sup><br/>(nm)</b> | <b>BET<sup>b</sup><br/>(m<sup>2</sup>/g)</b> | <b>Pore size<br/>(nm)</b> |
|--------------------|---------------------------------|-------------|----------------------------------------|----------------------------------------------|---------------------------|
| NiO                | 43.240                          | 0.641       | 2.97                                   | 62.01                                        | 9.39                      |
| NiO-O <sub>v</sub> | 43.220                          | 0.820       | 2.32                                   | 136.55                                       | 12.37                     |

<sup>a</sup> calculated by the method of Scherrer's equation based on the diffraction of the (200) peak of NiO at  $2\theta = 43.1^\circ$ .

<sup>b</sup> calculated by the method of specific surface area.

**Table S2.** The summary of XPS results of different NiO samples.

| Sample             | Binding energy (eV)  |                  |                |                |                | Atomic ratio(%)                     |                                                                         | EPR<br>area         |
|--------------------|----------------------|------------------|----------------|----------------|----------------|-------------------------------------|-------------------------------------------------------------------------|---------------------|
|                    | Ni 2p <sub>3/2</sub> |                  | O 1s           |                |                | Ni <sup>3+</sup> / Ni <sup>2+</sup> | O <sub>β</sub> /<br>(O <sub>α</sub> + O <sub>β</sub> + O <sub>γ</sub> ) |                     |
|                    | Ni <sup>2+</sup>     | Ni <sup>3+</sup> | O <sub>α</sub> | O <sub>β</sub> | O <sub>γ</sub> |                                     |                                                                         |                     |
| NiO                | 853.6                | 855.43           | 529.15         | 531.18         | 532.14         | 1.72                                | 21.4                                                                    | 8.1×10 <sup>4</sup> |
| NiO-O <sub>v</sub> | 853.63               | 855.45           | 529.18         | 531.08         | 532.91         | 1.85                                | 32.8                                                                    | 1.1×10 <sup>5</sup> |



**Table S3.** Comparison of kinetic parameters ( $K_m$  and  $V_{max}$ ) corresponding to different nanozymes

| <b>Substrate</b> | <b>Nanozymes</b>  | <b><math>K_m</math> (<math>\mu\text{M}</math>)</b> | <b><math>V_{max}</math> (<math>\text{nM s}^{-1}</math>)</b> | <b>Ref.</b> |
|------------------|-------------------|----------------------------------------------------|-------------------------------------------------------------|-------------|
| Amplex Red       | Bi–Au NPs         | 89.3                                               | 15.0                                                        | 1           |
|                  | ZiF-67            | 5.28                                               | 28.2                                                        | 2           |
|                  | FeP@C             | 2.30                                               | —                                                           | 3           |
|                  | Au/AgCl           | 17                                                 | 4.6                                                         | 4           |
|                  | MFNP1:1           | 34.2                                               | 244                                                         | 5           |
|                  | CoOxH-GO          | 4.87                                               | 0.839                                                       | 6           |
|                  | NiO- $\text{O}_V$ | 2.83                                               | 26.7                                                        | this work   |

**Table S4. Detection range and detection limit of L-Cys by different systems**

| <b>System</b>                                             | <b>Method</b>     | <b>Linear range<br/>(<math>\mu\text{M}</math>)</b> | <b>Detection limit<br/>(nM)</b> | <b>Ref.</b> |
|-----------------------------------------------------------|-------------------|----------------------------------------------------|---------------------------------|-------------|
| $\text{Co}_4\text{S}_3$                                   | fluorescence      | 0.25-2.5                                           | 75                              | 7           |
| AuNRs/Au-Ag NCs                                           | fluorescence      | 5-100                                              | $1.73 \times 10^3$              | 8           |
| AuNCs-AuNPs                                               | fluorescence      | 1.5-35                                             | $1.4 \times 10^3$               | 9           |
| Si-CDs                                                    | fluorescence      | 20-100                                             | 410                             | 10          |
| CDs                                                       | chemiluminescence | 10-100                                             | $8.8 \times 10^3$               | 11          |
| OV- $\text{Mn}_3\text{O}_4$                               | colorimetric      | 5-800                                              | $1.31 \times 10^3$              | 12          |
| $\text{Gd}(\text{OH})_3$                                  | colorimetric      | 0.2-75                                             | $2.6 \times 10^3$               | 13          |
| 2D $\text{Co}_3\text{S}_4$                                | colorimetric      | 0.2-100                                            | $2.7 \times 10^3$               | 14          |
| $\text{VS}_4$                                             | colorimetric      | 5-100                                              | $2.5 \times 10^3$               | 15          |
| $[\text{Ag}_2(\text{bit})_2]_2[\text{Mo}_8\text{O}_{26}]$ | colorimetric      | 1-100                                              | 220                             | 16          |
| rGO-GP                                                    | colorimetric      | 2-30                                               | 100                             | 17          |
| $\text{MnO}_2$ nanobelts                                  | colorimetric      | 0-35                                               | 100                             | 18          |
| $\text{MnO}_2@\text{Co}_3\text{O}_4$                      | colorimetric      | 1.25-25                                            | $1.1 \times 10^3$               | 19          |
| $\text{NiO-O}_\text{V}$                                   | fluorescence      | 0.05-2                                             | 37.8                            | this work   |

## Reference:

1. C. W. Lien, C. C. Huang and H. T. Chang, *Chem Commun.* 2012, **48**, 7952-7954.
2. T. Jin, Y. L. Li, W. J. Jing, Y. C. Li, L. Z. Fan and X. H. Li, *Chem Commun.* 2020, **56**, 659-662.
3. C. Song, W. Zhao, H. Liu, W. Ding, L. Zhang, J. Wang, Y. Yao and C. Yao, *J Mater Chem B.* 2020, **8**, 7494-7500.
4. P. C. Kuo, C. W. Lien, J. Y. Mao, B. Unnikrishnan, H. T. Chang, H. J. Lin and C. C. Huang, *Anal Chim Acta.* 2018, **1009**, 89-97.
5. C. W. Wu, B. Unnikrishnan, Y. T. Tseng, S. C. Wei, H. T. Chang and C. C. Huang, *J Colloid Interf Sci.* 2019, **541**, 75-85.
6. C. W. Lien, B. Unnikrishnan, S. G. Harroun, C. M. Wang, J. Y. Chang, H. T. Chang and C. C. Huang, *Biosens Bioelectron.* 2018, **102**, 510-517.
7. J. W. Wang, P. J. Ni, C. X. Chen, Y. Y. Jiang, C. H. Zhang, B. Wang, B. Q. Cao and Y. Z. Lu, *Microchim Acta.* 2020, **187**, 1-8.
8. J. J. Li, D. Qiao, J. Zhao, G. J. Weng, J. Zhu and J. W. Zhao, *Spectrochim Acta A.* 2019, **217**, 247-255.
9. X. F. Li, J. Qiao, Z. W. Li and L. Qi, *Analyst.* 2020, **145**, 2233-2237.
10. M. H. Zan, C. Li, D. M. Zhu, L. Rao, Q. F. Meng, B. Chen, W. Xie, X. W. Qie, L. Li, X. J. Zeng, Y. R. Li, W. F. Dong and W. Liu, *J Mater Chem B.* 2020, **8**, 919-927.
11. C. Wang, Y. X. Lan, F. Yuan, T. H. Fereja, B. H. Lou, S. Han, J. P. Li and G. B. Xu, *Microchim Acta.* 2020, **187**, 1-6.
12. W. H. Lu, J. Chen, L. S. Kong, F. Zhu, Z. Y. Feng and J. H. Zhan, *Sensor Actuat B-Chem.* 2021, **333**, 129560.
13. M. Singh, P. Weerathunge, P. D. Liyanage, E. Mayes, R. Ramanathan and V. Bansal, *Langmuir.* 2017, **33**, 10006-10015.
14. S. Hashmi, M. Singh, P. Weerathunge, E. L. H. Mayes, P. D. Mariathomas, S. N. Prasad, R. Ramanathan and V. Bansal, *Acs Appl Nano Mater.* 2021, **4**, 13352-13362.
15. C. Chen, Y. Wang and D. Zhang, *Microchim Acta.* 2019, **186**, 1-8.
16. B. Li, H. Chang, C. Wang and S. Wang, *Journal of Cluster Science.* 2021, **33**, 2463-2473.
17. C. Liu, Y. M. Zhao, D. Xu, X. X. Zheng and Q. Huang, *Anal Bioanal Chem.* 2021, **413**, 4013-4022.
18. S. Y. Feng, F. T. Wen, L. He, J. Y. Su, P. Jiang and D. P. He, *Sensor Actuat B-Chem.* 2022, **361**, 131745.
19. L. Y. Zhu, J. Zheng, Y. N. Ci, L. Han, J. J. Meng, J. Y. Qian and X. B. Yin, *Crystengcomm.* 2024, **26**, 1292-1302.
